# Supplementary material
Source: publisher figshare collection journal article supplement (https://tandf.figshare.com/articles/dataset/_/7969535)

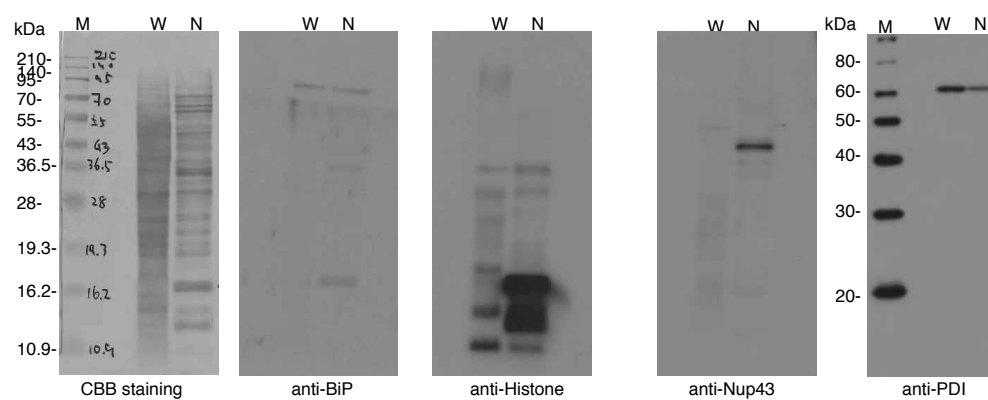

Fig. S1.

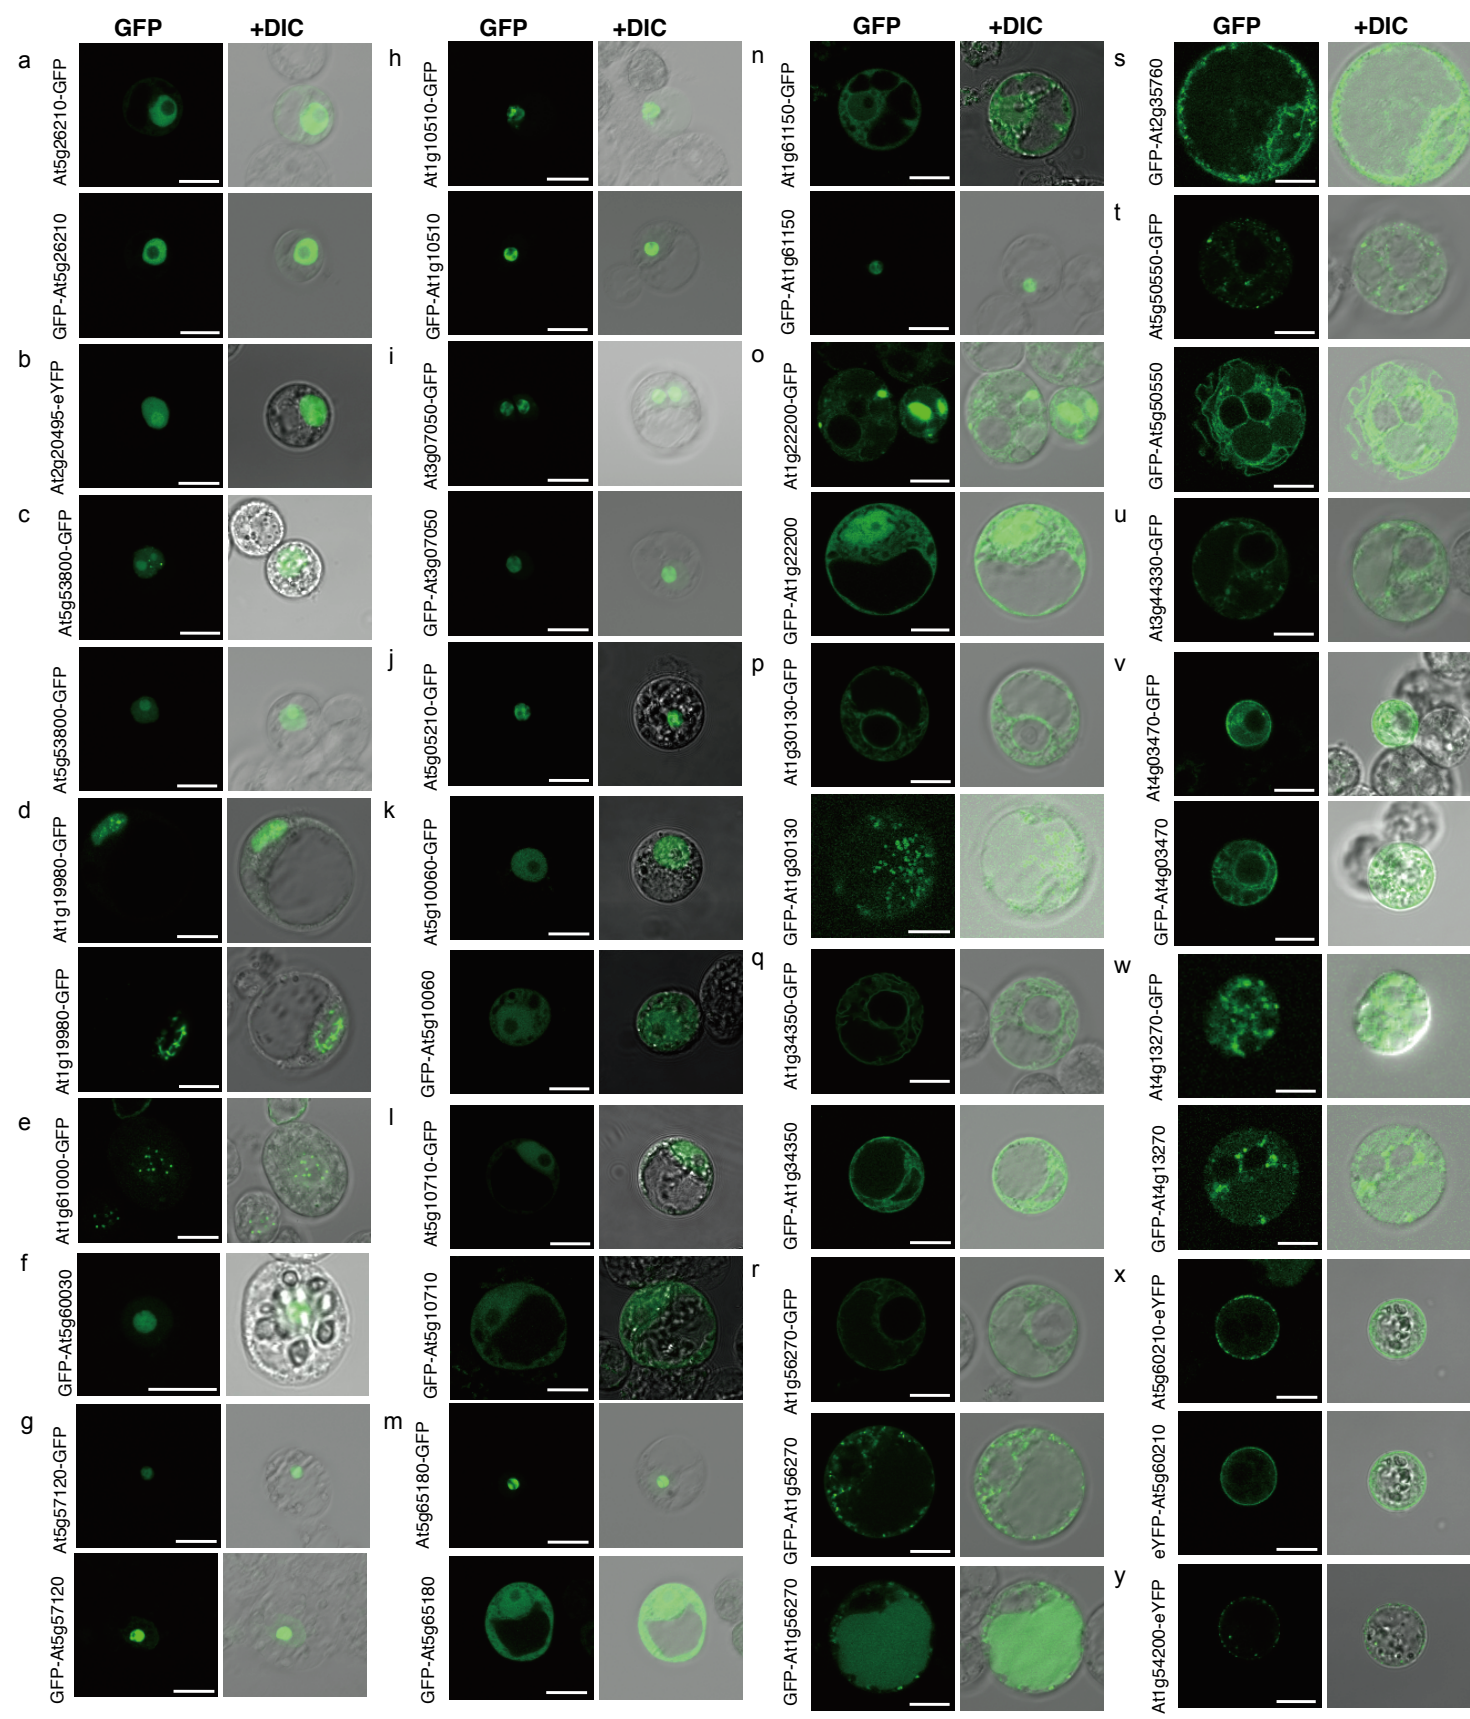

Bars = 10  $\mu$ m

Fig. S2.

Supplement: Supplementary file 1 [file 1]
